# Supplementary material for: Improved Anther Culture Media for Enhanced Callus Formation and Plant Regeneration in Rice (Oryza sativa L.)
Source: MDPI journal article supplement (doi:10.3390/plants10050839), 2021-04-22
Supplement: s1 [file s1]

**Supplementary Table 1** Results of Analysis of variance (ANOVA) for the percentage of green plantlet regeneration (RGP), percentage of albino plants regeneration (PAP), regeneration efficiency of green plantlets (RGPE), and regeneration efficiency of albino plantlets (PAPE).

|                         | <b>Df</b> | <b>MS of RGP</b> | <b>MS of PAP</b> | <b>MS of RGPE</b> | <b>MS of PAPE</b> |
|-------------------------|-----------|------------------|------------------|-------------------|-------------------|
| <b>Genotype</b>         | 2         | 21578***         | 5379***          | 2193***           | 302.70***         |
| <b>Media</b>            | 3         | 14628***         | 3186***          | 4124***           | 219.80***         |
| <b>Genotype : Media</b> | 6         | 2342***          | 3196***          | 628***            | 90.35***          |
| <b>Residuals</b>        | 48        | 5                | 13               | 20                | 92                |

Data were statistically analyzed with two-way ANOVA (P=0.05).

\*\*\* Significant at the 0.001 probability level.
